# Supplementary material
Source: PubMed Central journal article supplement (PMC2180165)
Supplement: NIHMS32400-supplement-1.pdf [file NIHMS32400-supplement-1.pdf]

**Supplemental Table 1.** Primers for each of the 16 MYH exons, size of amplicons, and oven temperatures

| Primer* | Primer sequence (5' to 3')                  | Size of amplicon (bp) | Wave oven temperature(s), °C |
|---------|---------------------------------------------|-----------------------|------------------------------|
| 1 F     | GCGGCCCGCCGCCCCCGCCGTGTAGTCTCCTCGTGGCTAGTTC | 271                   | 65.5, 64.4                   |
| 1 R     | CCCGACTGCCTGAACCGC                          |                       |                              |
| 2 F     | GCGGCCCGCCGCCCCCGCCGGCTATCACCTTGGAAGGCCTCA  | 254                   | 62.4, 61.4                   |
| 2 R     | CCCAGCCTGAATCTGCCTTTCAT                     |                       |                              |
| 3 F     | GGGAGCATACTGCCACAGGCT                       | 288                   | 62.8, 63.1                   |
| 3 R     | GGCTGGGTGCCTGCCTCC                          |                       |                              |
| 4 F     | TGGGAGGCAGGCACCCAG                          | 200                   | 63.2, 64.2                   |
| 4 R     | GTTGGCATGAGGACACTGCTGAC                     |                       |                              |
| 5 F     | GCTGTGGGCCAGGTAGGG                          | 216                   | 62.0, 63.2                   |
| 5 R     | GAAGCCTTCTCTACACCCACCC                      |                       |                              |
| 6 F     | GAGAAGGCTTCCTCTACCACCTT                     | 200                   | 62.8, 60.8                   |
| 6 R     | TGATTCACCTCCTGTGGGTAGGA                     |                       |                              |
| 7 F     | GCGGCCCGCCGCCCCCATAGAGGGACTGACGGGT          | 201                   | 63.5                         |
| 7 R     | TACCACCTGATTGGAGTGC                         |                       |                              |
| 8 F     | GCGGCCCGCCGCCCCCGCCGGAGGGTAGGAACCCAGGAGTCTT | 223                   | 63.0, 64.3                   |
| 8 R     | GAGGAAGGAGGCTGGGCAC                         |                       |                              |
| 9 F     | AGCCTCCTTCCTCCCAGCC                         | 200                   | 64.3                         |
| 9 R     | CGGCCCGCCGCCCCCGCCCGCAGAGCTCCTTTGCAGACACCC  |                       |                              |
| 10 F    | GCGGCCCGCCGCCCCCGGGTGTCTGCAAAGGAGC          | 255                   | 63.8, 64.4                   |
| 10 R    | CGCCGCCCCCGCCCGAGTGTTCATAGGGCAGAGTCAC       |                       |                              |
| 11 F    | GCAGTGAGAAGTCCTAAGGAGTGA                    | 200                   | 64.2, 62.0                   |
| 11 R    | AGGTTAGAGGAAGAAGTGAATGGG                    |                       |                              |
| 12 F    | CCCTAAAGCCCTCTTGGCT                         | 291                   | 63.0, 64.2                   |
| 12 R    | CCATTCTCTCTTGTACTCATGC                      |                       |                              |
| 13 F    | GGGAATCGGCAGCTGAGGC                         | 255                   | 65.4, 62.5                   |
| 13 R    | CCCCGCCCCGGGTTCAAATAGGCCTGTGGATATAG         |                       |                              |
| 14 F    | CGGAATAGCCAAGGATGTTG                        | 279                   | 60.1, 63.1                   |
| 14 R    | CGCCGCCCCCGCCCGGTAGAACATGTAGGAAACACAAG      |                       |                              |
| 15 F    | GGCAGAACACCGGTTTATCTCTT                     | 206                   | 62.0                         |
| 15 R    | GTGGAGAATGTTACCCAGACAT                      |                       |                              |
| 16 F    | GAGAGGATTCTCTGCTCCC                         | 434                   | 55.9, 59.6, 60.9             |
| 16 R    | AGGGTGAAGGCTGTCCAAA                         |                       |                              |

\* Primers are denoted by an exon number and F (forward primer) or R (reverse primer).
